# Supplementary material for: Chemerin and PEDF Are Metaflammation-Related Biomarkers of Disease Activity and Obesity in Rheumatoid Arthritis
Source: PubMed Central journal article supplement (PMC6085446; doi:10.3389/fmed.2018.00207), 2018-08-03

## Supplementary Information

# **CHEMERIN AND PEDF ARE METAINFLAMMATION-RELATED BIOMARKERS OF DISEASE ACTIVITY AND OBESITY IN RHEUMATOID ARTHRITIS**

Tolusso Barbara<sup>1</sup>, Gigante Maria Rita<sup>1</sup>, Alivernini Stefano<sup>1</sup>, Petricca Luca<sup>1</sup>, Fedele Anna Laura<sup>1</sup>, Di Mario Clara<sup>1</sup>, Aquilanti Barbara<sup>2</sup>, Magurano Maria Rosaria<sup>3</sup>, Ferraccioli Gianfranco<sup>1</sup>, Gremese Elisa<sup>1,\*</sup>.

1. Division of Rheumatology, Fondazione Policlinico Universitario A. Gemelli, Catholic University of the Sacred Heart, Rome, Italy
2. Service of Dietary and Human Nutrition, Fondazione Policlinico Universitario A. Gemelli, Catholic University of the Sacred Heart, Rome, Italy
3. Service of Psychology and Psychotherapy, Fondazione Policlinico Universitario A. Gemelli , Catholic University of the Sacred Heart, Rome, Italy

**Supplemental Figure 1.** PEDF and Chemerin plasma levels in ERA patients correlate with BMI at diagnosis. Association between PEDF and Chemerin plasma levels, measured by ELISA, and BMI in ERA patients at diagnosis.

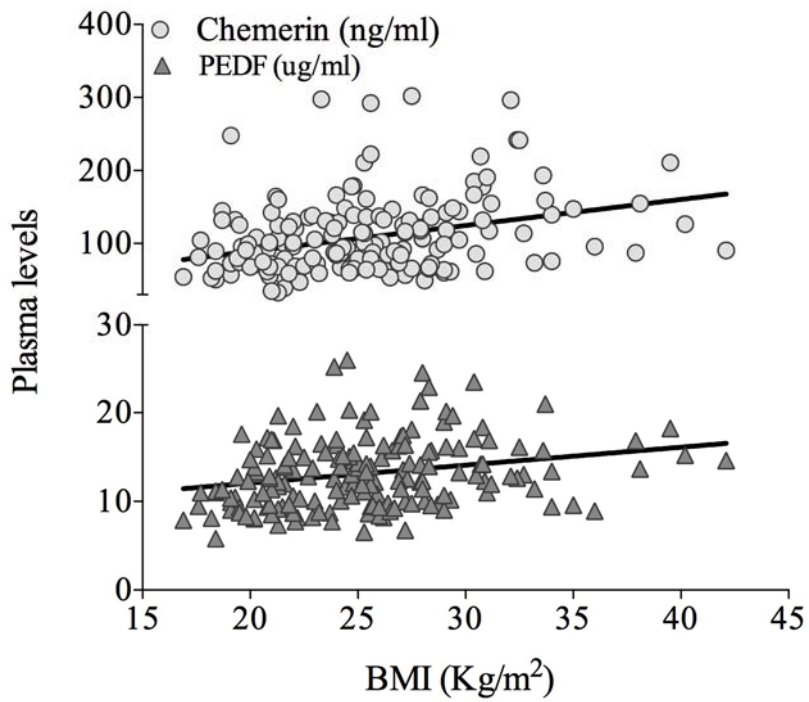

Supplement: Image_1.pdf [file Image_1.pdf]
