# Supplementary material for: Chemerin and PEDF Are Metaflammation-Related Biomarkers of Disease Activity and Obesity in Rheumatoid Arthritis
Source: PubMed Central journal article supplement (PMC6085446; doi:10.3389/fmed.2018.00207), 2018-08-03

**Supplemental Figure 3.** Mean changes in disease activity from baseline in overweight/obese RA patients with a low-moderate disease activity undergoing a scheduled dietetic regimen aiming to weight loss. Patients were divided based on the percentage of reduction of BMI (< or  $\geq$  5%); \*:  $p \leq 0.05$  and \*\*:  $p \leq 0.01$ .

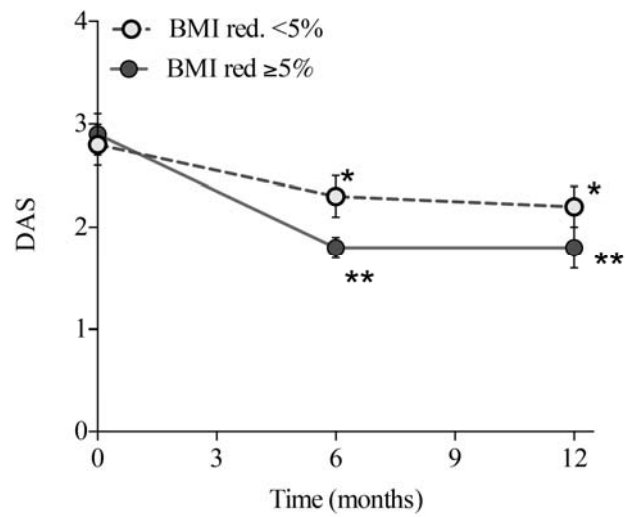

Supplement: Image_3.pdf [file Image_3.pdf]
